# Supplementary material for: Comprehensive analyses reveal the prognosis and biological function roles of chromatin regulators in lung adenocarcinoma
Source: publisher site journal article supplement (doi:10.18632/aging.204693), 2023-05-05
Supplement: Supplementary file [file aging-v15i9-204693-supplementary-material-SD2.pdf]

## SUPPLEMENTARY TABLES

**Supplementary Table 1. The clinical information of 41 patients with benign lung disease for NPAS2 in IHC analysis.**

|                  |                 | Cases (n) | Percentage (%) |
|------------------|-----------------|-----------|----------------|
| Gender           | Male            | 25        | 61.0           |
|                  | Female          | 16        | 39.0           |
| Age              | <60             | 27        | 65.9           |
|                  | ≥60             | 14        | 34.1           |
| Type of diseases | Pulmonary bulla | 24        | 58.6           |
|                  | Hamartoma       | 11        | 26.8           |
|                  | CCAM            | 4         | 9.8            |
|                  | BPS             | 1         | 2.4            |
|                  | pneumothorax    | 1         | 2.4            |

\*CCAM, congenital cystic adenomatoid malformation; BPS, bronchopulmonary sequestration.

**Supplementary Table 2. The basic information of 388 patients with LUAD for NPAS2 IHC analysis.**

|                  |           | Cases (n) | Percentage (%) |
|------------------|-----------|-----------|----------------|
| Gender           | Female    | 187       | 48.2           |
|                  | Male      | 201       | 51.8           |
| Age              | <60       | 178       | 45.9           |
|                  | ≥60       | 210       | 54.1           |
| Grade            | G1        | 33        | 8.5            |
|                  | G2        | 252       | 64.9           |
|                  | G3        | 96        | 24.8           |
|                  | NA        | 7         | 1.8            |
| T classification | T1        | 112       | 28.9           |
|                  | T2        | 205       | 52.8           |
|                  | T3        | 51        | 13.1           |
|                  | T4        | 20        | 5.2            |
| N classification | N0        | 217       | 55.9           |
|                  | N1        | 98        | 25.3           |
|                  | N2        | 61        | 15.7           |
|                  | N3        | 4         | 1.0            |
| M classification | NA        | 8         | 2.1            |
|                  | M0        | 366       | 94.3           |
|                  | M1        | 22        | 5.7            |
| Stage            | Stage I   | 182       | 46.9           |
|                  | Stage II  | 100       | 25.8           |
|                  | Stage III | 84        | 21.6           |
|                  | Stage IV  | 22        | 5.7            |

\*NA, Not available.

**Supplementary Table 3. The relationship between NPAS2 expression level and clinical pathological characteristics in 388 patients with LUAD.**

| Parameters       | Number of cases | NPAS2 IHC expression |              | P values           |
|------------------|-----------------|----------------------|--------------|--------------------|
|                  |                 | Low (n=204)          | High (n=184) |                    |
| Gender           |                 |                      |              |                    |
| Female           | 187             | 100                  | 87           | 0.732              |
| Male             | 201             | 104                  | 97           |                    |
| Age              |                 |                      |              |                    |
| <60              | 178             | 91                   | 87           | 0.598              |
| ≥60              | 210             | 113                  | 97           |                    |
| Grade            |                 |                      |              |                    |
| G1-G2            | 285             | 160                  | 125          | <b>0.035*</b>      |
| G3               | 96              | 42                   | 54           |                    |
| NA               | 7               | 2                    | 5            |                    |
| T classification |                 |                      |              |                    |
| T1-2             | 317             | 169                  | 148          | 0.540              |
| T3-4             | 71              | 35                   | 36           |                    |
| N classification |                 |                      |              |                    |
| N0               | 217             | 134                  | 83           | <b>0.0002*</b>     |
| N1-3             | 163             | 69                   | 94           |                    |
| NA               | 8               | 1                    | 7            |                    |
| M classification |                 |                      |              |                    |
| M0               | 366             | 197                  | 169          | <b>0.045*</b>      |
| M1               | 22              | 7                    | 15           |                    |
| Stage            |                 |                      |              |                    |
| I-II             | 282             | 168                  | 114          | <b>&lt;0.0001*</b> |
| III-IV           | 106             | 36                   | 70           |                    |

\*IHC, Immunohistochemistry; NA, Not available.

**Supplementary Table 4. Univariate analysis of NPAS2 expression and clinical pathological characteristics associated with distant metastasis-free survival in 388 patients with LUAD.**

| <b>Parameters</b>                 | <b>Hazard ratio (95%CI)</b> | <b>P values</b>    |
|-----------------------------------|-----------------------------|--------------------|
| Gender (male v.s. female)         | 1.379(0.994-1.914)          | 0.055              |
| Age ( $\geq 60$ v.s. $<60$ )      | 1.044(0.755-1.444)          | 0.795              |
| Grade (G1-G2 v.s. G3)             | 1.939(1.516-3.144)          | <b>&lt;0.0001*</b> |
| T classification (T1-2 v.s. T3-4) | 2.183(1.451-2.967)          | <b>&lt;0.0001*</b> |
| N classification (N1-3 v.s. N0)   | 2.598(1.853-3.641)          | <b>&lt;0.0001*</b> |
| M classification (M1 v.s. M0)     | 4.642(2.812-7.661)          | <b>&lt;0.0001*</b> |
| Stage (III-IV v.s. I-II)          | 4.425(3.188-6.141)          | <b>&lt;0.0001*</b> |
| NPAS2 expression (high v.s. low)  | 2.102(1.507-2.931)          | <b>&lt;0.0001*</b> |

**Supplementary Table 5. Multivariate analysis of NPAS2 expression and clinical pathological characteristics associated with distant metastasis-free survival in 388 patients with LUAD.**

| <b>Parameters</b>                 | <b>Hazard ratio (95%CI)</b> | <b>P values</b>    |
|-----------------------------------|-----------------------------|--------------------|
| Gender (male v.s. female)         | 1.396(0.969-2.013)          | 0.074              |
| Grade (G3 v.s. G1-G2)             | 1.328(0.900-1.961)          | 0.153              |
| T classification (T3-4 v.s. T1-2) | 0.919(0.574-1.472)          | 0.726              |
| N classification (N1-3 v.s. N0)   | 1.330(0.965-2.045)          | 0.194              |
| M classification (M1 v.s. M0)     | 2.203(1.112-4.367)          | <b>0.024*</b>      |
| Stage (III-IV v.s. I-II)          | 2.901(1.719-4.894)          | <b>&lt;0.0001*</b> |
| NPAS2 expression (high v.s. low)  | 1.509(1.053-2.163)          | <b>0.025*</b>      |
